# Supplementary material
Source: PubMed Central journal article supplement (PMC2723939)
Supplement: NIHMS101874-supplement-1_si_001.pdf [file NIHMS101874-supplement-1_si_001.pdf]

## Supporting Information for:

# Trends in Ground-State Entropies for Transition Metal Based Hydrogen Atom Transfer Reactions

*Elizabeth A. Mader,<sup>§,‡,\*</sup> Virginia W. Manner,<sup>§</sup> Todd F. Markle,<sup>§</sup>*

*Adam Wu,<sup>§</sup> James A. Franz,<sup>†</sup> and James M. Mayer<sup>§,\*</sup>*

Department of Chemistry, University of Washington

Box 351700, Seattle, WA, 98195-1700, USA

Chemical & Materials Sciences Division, Pacific Northwest National Laboratory

P.O. Box 999, Richland, WA 99352, USA

E-mail: [mayer@chem.washington.edu](mailto:mayer@chem.washington.edu)

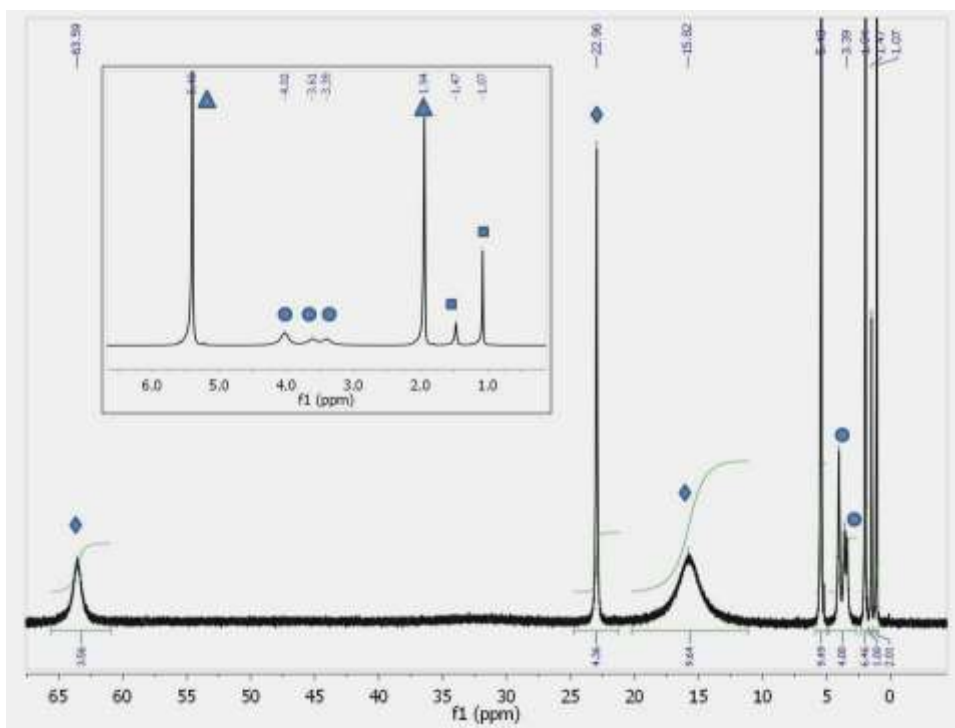

**Figure S1.** <sup>1</sup>H NMR spectrum of an equilibrium mixture of **Co<sup>II</sup>(H<sub>2</sub>bim)** (♦) + TEMPO  $\rightleftharpoons$  **Co<sup>III</sup>(Hbim)** (●) + TEMPOH (■) starting from 10.8 mM **Co<sup>II</sup>(H<sub>2</sub>bim)** and 0.12 M TEMPO in CD<sub>3</sub>CN at 280K. The remaining peaks (▲) are residual solvent and CH<sub>2</sub>Cl<sub>2</sub> (integration standard). Inset: Upfield region of spectrum.

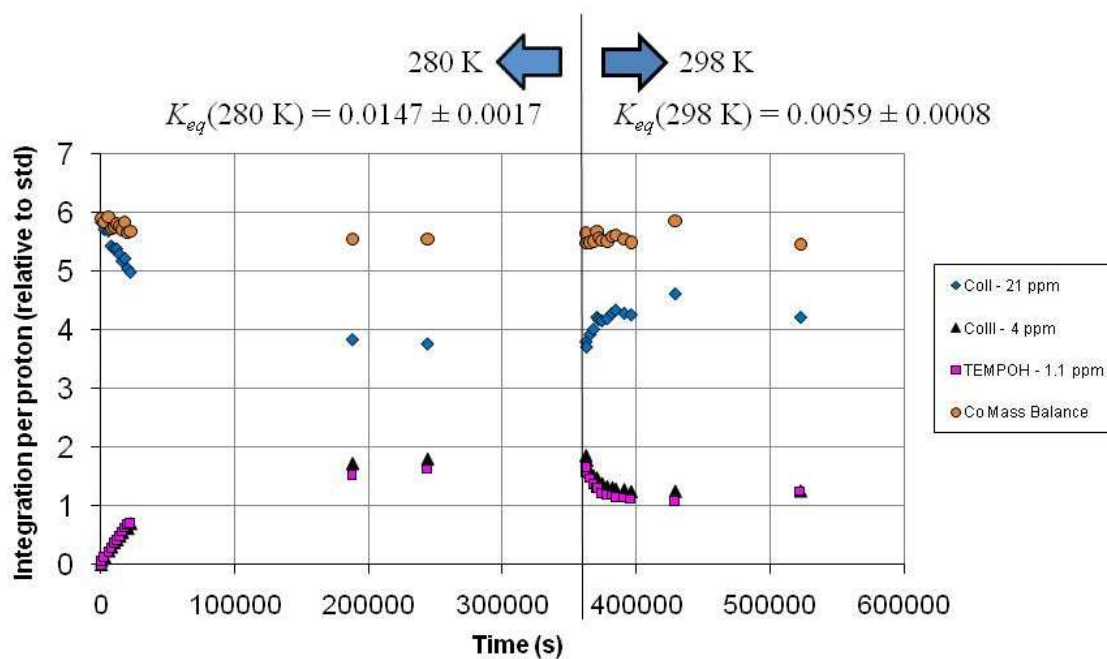

**Figure S2.** Equilibration study for  $\text{Co}^{\text{II}}(\text{H}_2\text{bim}) + \text{TEMPO} \rightleftharpoons \text{Co}^{\text{III}}(\text{Hbim}) + \text{TEMPOH}$ . Mixed 10.8 mM  $\text{Co}^{\text{II}}(\text{H}_2\text{bim})$  and 0.12 M TEMPO in  $\text{CD}_3\text{CN}$  and plotted change in integration of  $^1\text{H}$  NMR signal versus time. For the first 36000 seconds the reaction was equilibrated at 280 K, then the NMR tube was removed from the cold bath and re-equilibrated at 298 K (36000 to 52000 seconds). The appearance of TEMPOH ( $\blacksquare$ ) and  $\text{Co}^{\text{III}}(\text{Hbim})$  ( $\blacktriangle$ ) are plotted along with the disappearance of  $\text{Co}^{\text{II}}(\text{H}_2\text{bim})$  ( $\blacklozenge$ ) and total amount of cobalt ( $\bullet$ ).

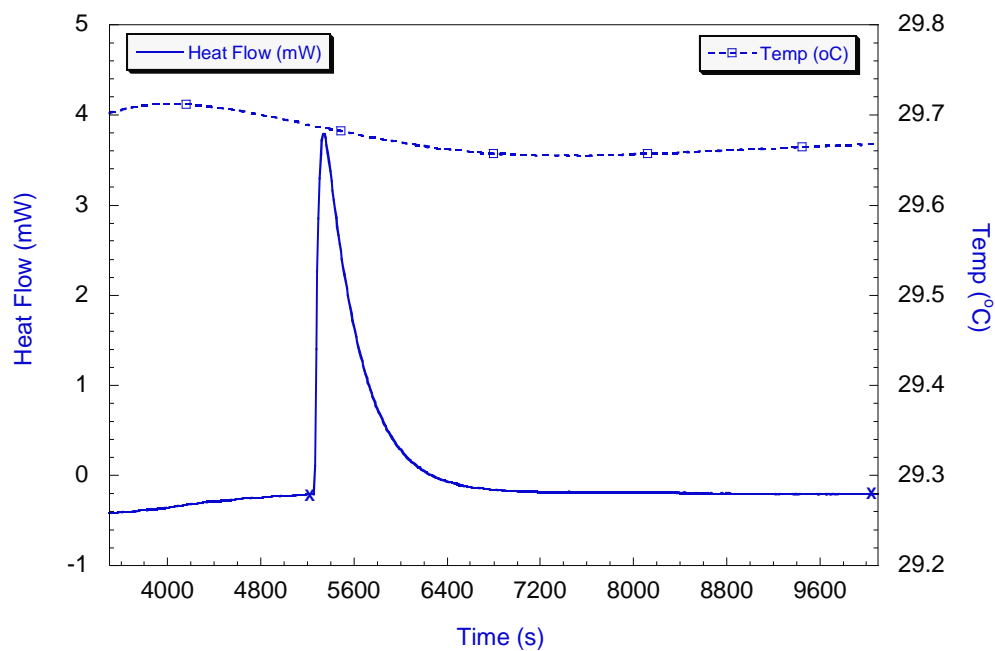

**Figure S3.** Heat flow curve (—) and sample temperature (-□-) for the reaction between 11.0 mM TEMPOH + 14.7 mM  $t\text{Bu}_3\text{PhO}^\bullet$  in MeCN. The “x” mark the integration points used to extract the enthalpy of reaction.

**BDFE[TEMPOH]<sub>MeCN</sub> determination from p*K*<sub>a</sub> and *E*<sup>o</sup> values.**

Figure S4 shows the relevant values required to determine the BDFE of TEMPOH in MeCN using a p*K*<sub>a</sub> and *E*<sup>o</sup> thermochemical cycle. Equation 21 from the text is reproduced here for clarity as eq S1. *E*<sup>o</sup>[TEMPOH] is a reversible wave at 0.71 V vs FeCp<sub>2</sub><sup>+0</sup>.<sup>1</sup> *E*<sup>o</sup>[TEMPOH<sup>+</sup>] is an irreversible wave at -1.9 V vs FeCp<sub>2</sub><sup>+0</sup>.<sup>2</sup> The p*K*<sub>a</sub> for TEMPOH was measured in DMSO by Bordwell and co-workers<sup>3</sup> and can be converted to a value in MeCN using the linear relation discovered for phenols by Chantooni<sup>4</sup> and generalized to other substrates by Kutt.<sup>5</sup> The p*K*<sub>a</sub>[TEMPOH<sup>+</sup>] is determined from eq S2 (all potentials in V vs. Fc<sup>+0</sup>) to be -3. This very low p*K*<sub>a</sub> is consistent with the literature indicating that TEMPO<sup>+</sup> should be a very acidic species.<sup>6</sup>

$$\text{BDFE}_{\text{MeCN}} (\text{kcal mol}^{-1}) = nFE^{\circ}(\text{vs. Fc}^{+/0}) + 2.303RTpK_a + 54.9 \quad (\text{S1})$$

$$23.1\{E^{\circ}[\text{TEMPOH}] - E^{\circ}[\text{TEMPO}^{\cdot}]\} = 1.37\{pK_a[\text{TEMPOH}] - pK_a[\text{TEMPO}^{+\cdot}]\} \quad (\text{S2})$$

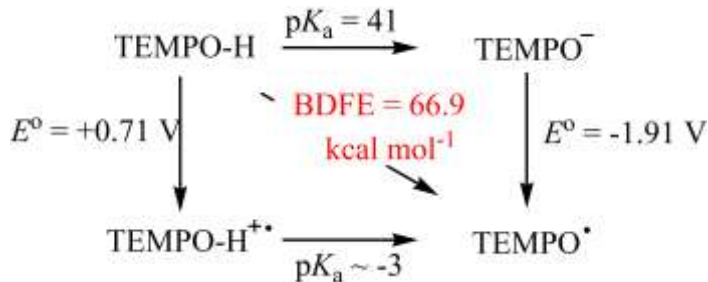

**Figure S4.** Thermochemical data for TEMPOH in MeCN.

**Calculations**

Unless stated otherwise all data was generated using the (RO)B3LYP/6-31+G(,p) method, following Bakalbassis.<sup>7</sup> Bakalbassis found this method to give comparable results to his preferred method, (U)B3LYP/6-31+(,3pd), which was too computationally costly for the <sup>t</sup>Bu<sub>3</sub>PhO<sup>·</sup>/H system. For PCM calculations on hydrogen atom, the atomic radius reported by Bondi<sup>8</sup> was used in the creation of the cavity. However,  $\Delta H_{\text{solv}}[\text{H}^{\cdot}]_{\text{MeCN}}$  was computed to be very small, < 0.1 kcal mol<sup>-1</sup>, therefore the experimental estimate,  $\Delta H_{\text{solv}}[\text{H}^{\cdot}]_{\text{MeCN}} \approx \Delta H_{\text{solv}}[\text{H}_2]_{\text{MeCN}} = 1.56 \text{ kcal mol}^{-1}$ , was used in conjunction with the computational value of  $\Delta H_{\text{solv}} [{}^t\text{Bu}_3\text{PhO}^{\cdot} - {}^t\text{Bu}_3\text{PhOH}]$  in Eq. 19 for the computation of BDE[<sup>t</sup>Bu<sub>3</sub>PhOH]<sub>MeCN</sub>.

Preliminary geometry optimizations were performed at (U)/B3LYP/6-31G(d) and (U)B3LYP/6-31+G(,p) levels of theory. Computed values of BDE,  $\Delta H^{\circ}_{\text{solv}} [{}^t\text{Bu}_3\text{PhO}^{\cdot} - {}^t\text{Bu}_3\text{PhOH}]$ , and  $\Delta G^{\circ}_{\text{solv}}$  are given in Table S6. The effect of the solvent model on the optimized geometries was chemically negligible. Selected bond lengths are given in Table S7. Relevant computed electronic and thermochemical data are given in Table S8.

Cartesian coordinates for (RO)B3 LYP/6-31+G(p) optimized structures are given in Tables S9-S12.

**Table S6.** Computed BDE's,  $\Delta H^\circ_{\text{solv}}$  [ ${}^t\text{Bu}_3\text{PhO}^\bullet - {}^t\text{Bu}_3\text{PhOH}$ ], and  $\Delta G^\circ_{\text{solv}}$ .<sup>a</sup>  
(RO)B3LYP/6-31+G(p)

|                                                                                                                                   |       |
|-----------------------------------------------------------------------------------------------------------------------------------|-------|
| BDE <sub>(g)</sub> <sup>b,c</sup>                                                                                                 | 79.3  |
| BDE <sub>(MeCN)</sub> <sup>c</sup>                                                                                                | 78.9  |
| $\Delta H^\circ_{\text{solv}}$ [ ${}^t\text{Bu}_3\text{PhO}^\bullet - {}^t\text{Bu}_3\text{PhOH}$ ] <sup>d</sup>                  | -0.4  |
| $\Delta G^\circ_{\text{solv,MeCN}}$ [ ${}^t\text{Bu}_3\text{PhO}^\bullet_{(g)} - {}^t\text{Bu}_3\text{PhOH}_{(g)}$ ] <sup>e</sup> | -0.4  |
| $\Delta G^\circ_{\text{solv,C6H6}}$ [ ${}^t\text{Bu}_3\text{PhO}^\bullet_{(g)} - {}^t\text{Bu}_3\text{PhOH}_{(g)}$ ] <sup>e</sup> | +0.04 |

<sup>a</sup> All energies are in kcal mol<sup>-1</sup>. <sup>b</sup> The experimental value is BDE[ ${}^t\text{Bu}_3\text{PhOH}_{(g)}$ ] = 79.9 kcal mol<sup>-1</sup>, see manuscript. <sup>c</sup> Here BDE is calculated from absolute enthalpies, BDE =  $H_{\text{DFT}}[{}^t\text{Bu}_3\text{PhO}^\bullet_{(g)}] + H_{\text{DFT}}[\text{H}^\bullet_{(g)}] - H_{\text{DFT}}[{}^t\text{Bu}_3\text{PhOH}_{(g)}]$ . <sup>d</sup>  $\Delta H^\circ_{\text{solv}}[{}^t\text{Bu}_3\text{PhO}^\bullet - {}^t\text{Bu}_3\text{PhOH}] = H_{\text{DFT}}[{}^t\text{Bu}_3\text{PhOH}_{(\text{sln})}] + H_{\text{DFT}}[{}^t\text{Bu}_3\text{PhO}^\bullet_{(g)}] - H_{\text{DFT}}[{}^t\text{Bu}_3\text{PhOH}_{(g)}] - H_{\text{DFT}}[{}^t\text{Bu}_3\text{PhO}^\bullet_{(\text{sln})}]$ . <sup>e</sup>  $\Delta G^\circ_{\text{solv}}$  values for  ${}^t\text{Bu}_3\text{PhOH}$  and  ${}^t\text{Bu}_3\text{PhO}^\bullet$  were obtained from PCM single point calculations, see above.

**Table S7.** Selected bond lengths (Å) optimized at (RO)B3LYP/6-31+G(p) with and without acetonitrile solvent model.

| Distance | ArOH  |       | ArO <sup>•</sup> |       |
|----------|-------|-------|------------------|-------|
|          | gas   | MeCN  | gas              | MeCN  |
| C1,O     | 1.412 | 1.411 | 1.293            | 1.295 |
| C1,C2    | 1.414 | 1.415 | 1.465            | 1.468 |
| C2,C3    | 1.410 | 1.411 | 1.392            | 1.391 |
| C3,C4    | 1.400 | 1.400 | 1.412            | 1.413 |
| C1,C2'   | 1.416 | 1.418 | 1.467            | 1.469 |
| C2',C3'  | 1.402 | 1.403 | 1.386            | 1.385 |
| C3',C4   | 1.406 | 1.406 | 1.419            | 1.420 |

**Table S8.** Computed electronic and thermochemical data.<sup>a</sup>

|                                               |                                      | (RO)B3LYP/6-31+G(p) |                       |
|-----------------------------------------------|--------------------------------------|---------------------|-----------------------|
|                                               |                                      | Gas Phase           | Solution <sup>b</sup> |
| <sup>t</sup> Bu <sub>3</sub> PhOH             | $E_{\text{el,DFT}}^c$                | -779.12467          | -779.12892            |
|                                               | $E_{\text{el,DFT}} + \text{ZPE}^d$   | -778.68111          | -778.68629            |
|                                               | $H_{\text{DFT}}^e$                   | -778.65822          | -778.66339            |
|                                               | $G_{\text{DFT}}^f$                   | -778.72916          | -778.73415            |
|                                               | Dipole <sup>g</sup>                  | 2.055               | 2.4532                |
|                                               | $\Delta G_{\text{solv(MeCN)}}^h$     |                     | 8.2                   |
|                                               | $\Delta G_{\text{solv(C6H6)}}^{h,i}$ |                     | 2.4                   |
| <sup>t</sup> Bu <sub>3</sub> PhO <sup>•</sup> | $E_{\text{el,DFT}}$                  | -778.48708          | -778.49501            |
|                                               | $E_{\text{el,DFT}} + \text{ZPE}$     | -778.05655          | -778.06234            |
|                                               | $H_{\text{DFT}}$                     | -778.03399          | -778.03975            |
|                                               | $G_{\text{DFT}}$                     | -778.10546          | -778.11114            |
|                                               | Dipole                               | 3.939               | 5.413                 |
|                                               | $\langle S^2 \rangle$                | NA                  | NA                    |
|                                               | $\Delta G_{\text{solv(MeCN)}}^h$     |                     | 7.8                   |
|                                               | $\Delta G_{\text{solv(C6H6)}}^{h,i}$ |                     | 2.4                   |
| H <sup>•</sup>                                | $E_{\text{el,DFT}}$                  | -0.50027            | -0.50049              |
|                                               | $E_{\text{el,DFT}} + \text{ZPE}$     | -0.50027            | -0.50049              |
|                                               | $H_{\text{DFT}}$                     | -0.49791            | -0.49813              |
|                                               | $G_{\text{DFT}}$                     | -0.51093            | -0.51114              |

<sup>a</sup> Energies are in hartrees, unless otherwise noted. <sup>b</sup> Computed with PCM model, see Experimental Section. Unless stated otherwise, the solvent is acetonitrile. <sup>c</sup> Electronic energy. <sup>d</sup> Sum of electronic and zero-point vibrational energies. <sup>e</sup> Sum of electronic and thermal enthalpies. <sup>f</sup> Sum of electronic and thermal free energies. <sup>g</sup> Total dipole in Debye. <sup>h</sup> Free energy of solution (kcal mol<sup>-1</sup>) is computed on the gas-phase optimized geometry, using the SCFVAC keyword in Gaussian 03, see Experimental Section. <sup>i</sup> Solvent = benzene.

**Table S9.** Cartesian coordinates for <sup>t</sup>Bu<sub>3</sub>PhOH optimized at B3LYP/6-31+G(p), gas phase.

| Center Number | Atomic Number | Atomic Type | Coordinates (Å) |           |           |
|---------------|---------------|-------------|-----------------|-----------|-----------|
|               |               |             | X               | Y         | Z         |
| 1             | 8             | 0           | 2.596043        | 0.565818  | 0.000260  |
| 2             | 6             | 0           | 1.225845        | 0.226711  | 0.000115  |
| 3             | 6             | 0           | 0.792415        | -1.118866 | 0.000042  |
| 4             | 6             | 0           | 0.324101        | 1.319096  | -0.000011 |
| 5             | 6             | 0           | -0.599025       | -1.344905 | 0.000015  |
| 6             | 6             | 0           | -1.043916       | 1.011971  | -0.000102 |
| 7             | 6             | 0           | -1.535644       | -0.305023 | -0.000052 |
| 8             | 6             | 0           | -3.060092       | -0.551970 | -0.000128 |
| 9             | 6             | 0           | 1.782249        | -2.316466 | 0.000042  |
| 10            | 6             | 0           | 0.812936        | 2.789581  | 0.000012  |
| 11            | 6             | 0           | 1.043834        | -3.681656 | -0.000175 |
| 12            | 6             | 0           | -0.370767       | 3.790812  | -0.000331 |
| 13            | 6             | 0           | 2.667276        | -2.306153 | 1.285791  |
| 14            | 6             | 0           | 1.658247        | 3.078532  | 1.275663  |
| 15            | 6             | 0           | 2.667580        | -2.305858 | -1.285490 |
| 16            | 6             | 0           | 1.658844        | 3.078372  | -1.275280 |
| 17            | 6             | 0           | -3.694019       | 0.090490  | 1.267397  |
| 18            | 6             | 0           | -3.693838       | 0.090337  | -1.267821 |
| 19            | 6             | 0           | -3.414138       | -2.058855 | -0.000056 |
| 20            | 1             | 0           | -1.753428       | 1.825640  | -0.000183 |
| 21            | 1             | 0           | -0.952591       | -2.362095 | 0.000043  |
| 22            | 1             | 0           | -4.777530       | -0.072952 | 1.274797  |
| 23            | 1             | 0           | -3.273920       | -0.350869 | 2.176941  |
| 24            | 1             | 0           | -3.516851       | 1.169011  | 1.304559  |
| 25            | 1             | 0           | -4.502287       | -2.178533 | -0.000132 |
| 26            | 1             | 0           | -4.777352       | -0.073082 | -1.275349 |
| 27            | 1             | 0           | -3.025543       | -2.567396 | 0.888245  |
| 28            | 1             | 0           | -3.516630       | 1.168849  | -1.305090 |
| 29            | 1             | 0           | -3.025415       | -2.567518 | -0.888232 |
| 30            | 1             | 0           | -3.273622       | -0.351149 | -2.177249 |
| 31            | 1             | 0           | 1.784901        | -4.487074 | 0.000091  |
| 32            | 1             | 0           | 0.028499        | 4.809692  | -0.000152 |
| 33            | 1             | 0           | 0.418006        | -3.807441 | 0.888025  |
| 34            | 1             | 0           | -1.000115       | 3.682805  | 0.888885  |
| 35            | 1             | 0           | 0.418619        | -3.807473 | -0.888797 |
| 36            | 1             | 0           | -0.999524       | 3.682891  | -0.889975 |
| 37            | 1             | 0           | 3.356272        | -3.157351 | 1.271564  |
| 38            | 1             | 0           | 1.986000        | 4.124466  | 1.272288  |
| 39            | 1             | 0           | 2.035356        | -2.392416 | 2.174804  |
| 40            | 1             | 0           | 1.058081        | 2.915285  | 2.177578  |
| 41            | 1             | 0           | 3.266751        | -1.400252 | 1.412638  |
| 42            | 1             | 0           | 2.538743        | 2.438698  | 1.321658  |
| 43            | 1             | 0           | 3.356858        | -3.156826 | -1.271103 |
| 44            | 1             | 0           | 1.986627        | 4.124296  | -1.271862 |
| 45            | 1             | 0           | 2.035885        | -2.392370 | -2.174640 |
| 46            | 1             | 0           | 1.059086        | 2.915051  | -2.177452 |
| 47            | 1             | 0           | 3.266673        | -1.399697 | -1.412147 |
| 48            | 1             | 0           | 2.539341        | 2.438506  | -1.320818 |
| 49            | 1             | 0           | 3.159440        | -0.214154 | 0.001189  |

**Table S10.** Cartesian coordinates for <sup>t</sup>Bu<sub>3</sub>PhOH optimized at B3LYP/6-31+G(p), MeCN solution..

| Center Number | Atomic Number | Atomic Type | Coordinates (Å) |           |           |
|---------------|---------------|-------------|-----------------|-----------|-----------|
|               |               |             | X               | Y         | Z         |
| 1             | 8             | 0           | -2.591983       | 0.606022  | -0.001209 |
| 2             | 6             | 0           | -1.229024       | 0.242399  | -0.000367 |
| 3             | 6             | 0           | -0.811501       | -1.109403 | 0.000194  |
| 4             | 6             | 0           | -0.310332       | 1.323185  | -0.000388 |
| 5             | 6             | 0           | 0.578355        | -1.350865 | 0.000278  |
| 6             | 6             | 0           | 1.054530        | 0.999666  | -0.000502 |
| 7             | 6             | 0           | 1.529597        | -0.323690 | -0.000259 |
| 8             | 6             | 0           | 3.050931        | -0.590484 | -0.000209 |
| 9             | 6             | 0           | -1.810321       | -2.299891 | 0.000547  |
| 10            | 6             | 0           | -0.775141       | 2.802192  | -0.000116 |
| 11            | 6             | 0           | -1.081532       | -3.670690 | 0.001954  |
| 12            | 6             | 0           | 0.423624        | 3.785823  | 0.000934  |
| 13            | 6             | 0           | -2.694859       | -2.282947 | -1.284557 |
| 14            | 6             | 0           | -1.614491       | 3.106302  | -1.276091 |
| 15            | 6             | 0           | -2.696251       | -2.281151 | 1.284674  |
| 16            | 6             | 0           | -1.615847       | 3.105373  | 1.275223  |
| 17            | 6             | 0           | 3.693911        | 0.045977  | -1.266447 |
| 18            | 6             | 0           | 3.693140        | 0.043205  | 1.267825  |
| 19            | 6             | 0           | 3.385633        | -2.101849 | -0.001846 |
| 20            | 1             | 0           | 1.774480        | 1.804171  | -0.000643 |
| 21            | 1             | 0           | 0.918905        | -2.372437 | 0.000650  |
| 22            | 1             | 0           | 4.775380        | -0.130576 | -1.270740 |
| 23            | 1             | 0           | 3.271630        | -0.391926 | -2.177136 |
| 24            | 1             | 0           | 3.529455        | 1.126825  | -1.302955 |
| 25            | 1             | 0           | 4.472445        | -2.233784 | -0.002263 |
| 26            | 1             | 0           | 4.774655        | -0.133065 | 1.272345  |
| 27            | 1             | 0           | 2.990350        | -2.604761 | -0.890588 |
| 28            | 1             | 0           | 3.528350        | 1.123902  | 1.306614  |
| 29            | 1             | 0           | 2.990838        | -2.606671 | 0.886024  |
| 30            | 1             | 0           | 3.270405        | -0.396767 | 2.177296  |
| 31            | 1             | 0           | -1.830820       | -4.468373 | 0.002442  |
| 32            | 1             | 0           | 0.038701        | 4.810445  | 0.001224  |
| 33            | 1             | 0           | -0.457479       | -3.803332 | -0.886856 |
| 34            | 1             | 0           | 1.051873        | 3.668346  | -0.887860 |
| 35            | 1             | 0           | -0.457970       | -3.801725 | 0.891348  |
| 36            | 1             | 0           | 1.050971        | 3.667458  | 0.890248  |
| 37            | 1             | 0           | -3.381200       | -3.136176 | -1.272886 |
| 38            | 1             | 0           | -1.932127       | 4.155461  | -1.268094 |
| 39            | 1             | 0           | -2.063956       | -2.363797 | -2.175299 |
| 40            | 1             | 0           | -1.012558       | 2.942656  | -2.177063 |
| 41            | 1             | 0           | -3.300609       | -1.379457 | -1.400445 |
| 42            | 1             | 0           | -2.499750       | 2.473211  | -1.328001 |
| 43            | 1             | 0           | -3.382516       | -3.134444 | 1.273464  |
| 44            | 1             | 0           | -1.933398       | 4.154560  | 1.267642  |
| 45            | 1             | 0           | -2.066300       | -2.360715 | 2.176206  |
| 46            | 1             | 0           | -1.014851       | 2.941059  | 2.176701  |
| 47            | 1             | 0           | -3.302189       | -1.377555 | 1.398684  |
| 48            | 1             | 0           | -2.501196       | 2.472315  | 1.325771  |
| 49            | 1             | 0           | -3.188185       | -0.151941 | -0.001251 |



**Table S11.** Cartesian coordinates for <sup>t</sup>Bu<sub>3</sub>PhO<sup>•</sup> optimized at ROB3LYP/6-31+G(p), gas phase.

| Center Number | Atomic Number | Atomic Type | Coordinates (Å) |           |           |
|---------------|---------------|-------------|-----------------|-----------|-----------|
|               |               |             | X               | Y         | Z         |
| 1             | 8             | 0           | -2.525670       | 0.611912  | 0.000352  |
| 2             | 6             | 0           | -1.271019       | 0.299090  | 0.000159  |
| 3             | 6             | 0           | -0.861947       | -1.107954 | 0.000177  |
| 4             | 6             | 0           | -0.248909       | 1.351990  | -0.000046 |
| 5             | 6             | 0           | 0.499590        | -1.397348 | 0.000004  |
| 6             | 6             | 0           | 1.082469        | 0.966694  | -0.000201 |
| 7             | 6             | 0           | 1.493217        | -0.392449 | -0.000178 |
| 8             | 6             | 0           | 2.997266        | -0.719354 | -0.000349 |
| 9             | 6             | 0           | -1.926594       | -2.220744 | 0.000367  |
| 10            | 6             | 0           | -0.667566       | 2.834534  | -0.000073 |
| 11            | 6             | 0           | -1.289768       | -3.633272 | 0.000300  |
| 12            | 6             | 0           | 0.558671        | 3.781377  | -0.000320 |
| 13            | 6             | 0           | -2.818921       | -2.105254 | -1.273023 |
| 14            | 6             | 0           | -1.509577       | 3.150319  | -1.273532 |
| 15            | 6             | 0           | -2.818535       | -2.105196 | 1.274023  |
| 16            | 6             | 0           | -1.509193       | 3.150473  | 1.273601  |
| 17            | 6             | 0           | 3.658361        | -0.104987 | -1.270301 |
| 18            | 6             | 0           | 3.658664        | -0.104922 | 1.269415  |
| 19            | 6             | 0           | 3.278552        | -2.241182 | -0.000343 |
| 20            | 1             | 0           | 1.849001        | 1.727420  | -0.000346 |
| 21            | 1             | 0           | 0.813454        | -2.428280 | 0.000014  |
| 22            | 1             | 0           | 4.731176        | -0.324935 | -1.274619 |
| 23            | 1             | 0           | 3.218755        | -0.525811 | -2.180043 |
| 24            | 1             | 0           | 3.537846        | 0.980871  | -1.307403 |
| 25            | 1             | 0           | 4.359705        | -2.409886 | -0.000455 |
| 26            | 1             | 0           | 4.731476        | -0.324891 | 1.273502  |
| 27            | 1             | 0           | 2.868221        | -2.731642 | -0.888585 |
| 28            | 1             | 0           | 3.538179        | 0.980940  | 1.306477  |
| 29            | 1             | 0           | 2.868409        | -2.731597 | 0.888011  |
| 30            | 1             | 0           | 3.219258        | -0.525681 | 2.179283  |
| 31            | 1             | 0           | -2.087990       | -4.381543 | 0.000413  |
| 32            | 1             | 0           | 0.207154        | 4.817355  | -0.000269 |
| 33            | 1             | 0           | -0.675678       | -3.807917 | -0.889347 |
| 34            | 1             | 0           | 1.181991        | 3.645100  | -0.890243 |
| 35            | 1             | 0           | -0.675444       | -3.807902 | 0.889788  |
| 36            | 1             | 0           | 1.182332        | 3.645130  | 0.889369  |
| 37            | 1             | 0           | -3.555949       | -2.915837 | -1.275835 |
| 38            | 1             | 0           | -1.783317       | 4.211242  | -1.276573 |
| 39            | 1             | 0           | -2.212221       | -2.197275 | -2.180674 |
| 40            | 1             | 0           | -0.929566       | 2.948654  | -2.180928 |
| 41            | 1             | 0           | -3.345303       | -1.151460 | -1.294448 |
| 42            | 1             | 0           | -2.420608       | 2.552829  | -1.296369 |
| 43            | 1             | 0           | -3.555570       | -2.915772 | 1.277091  |
| 44            | 1             | 0           | -1.782963       | 4.211387  | 1.276577  |
| 45            | 1             | 0           | -2.211558       | -2.197189 | 2.181492  |
| 46            | 1             | 0           | -0.928895       | 2.948952  | 2.180845  |
| 47            | 1             | 0           | -3.344899       | -1.151395 | 1.295571  |
| 48            | 1             | 0           | -2.420198       | 2.552957  | 1.296796  |

**Table S12.** Cartesian coordinates for <sup>t</sup>Bu<sub>3</sub>PhO<sup>•</sup> optimized at ROB3LYP/6-31+G(p) in MeCN solution.

| Center Number | Atomic Number | Atomic Type | Coordinates (Å) |           |           |
|---------------|---------------|-------------|-----------------|-----------|-----------|
|               |               |             | X               | Y         | Z         |
| 1             | 8             | 0           | -2.502060       | 0.739787  | 0.002355  |
| 2             | 6             | 0           | -1.262228       | 0.365338  | 0.001070  |
| 3             | 6             | 0           | -0.921337       | -1.061735 | 0.000121  |
| 4             | 6             | 0           | -0.187030       | 1.366776  | 0.000393  |
| 5             | 6             | 0           | 0.423699        | -1.416455 | 0.000342  |
| 6             | 6             | 0           | 1.122736        | 0.915274  | 0.000459  |
| 7             | 6             | 0           | 1.467215        | -0.462814 | 0.000729  |
| 8             | 6             | 0           | 2.950889        | -0.867077 | 0.000549  |
| 9             | 6             | 0           | -2.031426       | -2.129972 | -0.000727 |
| 10            | 6             | 0           | -0.521718       | 2.871188  | -0.000305 |
| 11            | 6             | 0           | -1.453127       | -3.568112 | -0.001519 |
| 12            | 6             | 0           | 0.755260        | 3.749863  | -0.003915 |
| 13            | 6             | 0           | -2.915938       | -1.982333 | -1.275603 |
| 14            | 6             | 0           | -1.343042       | 3.235098  | -1.273632 |
| 15            | 6             | 0           | -2.916572       | -1.982407 | 1.274191  |
| 16            | 6             | 0           | -1.338129       | 3.236655  | 1.276027  |
| 17            | 6             | 0           | 3.642882        | -0.287344 | -1.269886 |
| 18            | 6             | 0           | 3.643849        | -0.287663 | 1.270513  |
| 19            | 6             | 0           | 3.150794        | -2.401416 | 0.000190  |
| 20            | 1             | 0           | 1.926092        | 1.636097  | 0.000159  |
| 21            | 1             | 0           | 0.686672        | -2.461150 | 0.000060  |
| 22            | 1             | 0           | 4.701169        | -0.568875 | -1.272793 |
| 23            | 1             | 0           | 3.180050        | -0.683260 | -2.179618 |
| 24            | 1             | 0           | 3.585257        | 0.803960  | -1.304405 |
| 25            | 1             | 0           | 4.221960        | -2.624904 | 0.000755  |
| 26            | 1             | 0           | 4.702110        | -0.569344 | 1.272518  |
| 27            | 1             | 0           | 2.716343        | -2.868600 | -0.889416 |
| 28            | 1             | 0           | 3.586547        | 0.803634  | 1.305471  |
| 29            | 1             | 0           | 2.714989        | -2.869166 | 0.888829  |
| 30            | 1             | 0           | 3.181691        | -0.683730 | 2.180496  |
| 31            | 1             | 0           | -2.282769       | -4.281566 | -0.002287 |
| 32            | 1             | 0           | 0.458923        | 4.803229  | -0.004186 |
| 33            | 1             | 0           | -0.846330       | -3.766473 | -0.891042 |
| 34            | 1             | 0           | 1.368742        | 3.579724  | -0.894730 |
| 35            | 1             | 0           | -0.846937       | -3.767750 | 0.888128  |
| 36            | 1             | 0           | 1.372743        | 3.581331  | 0.884435  |
| 37            | 1             | 0           | -3.686538       | -2.761101 | -1.276161 |
| 38            | 1             | 0           | -1.557933       | 4.309450  | -1.274691 |
| 39            | 1             | 0           | -2.311154       | -2.104464 | -2.180985 |
| 40            | 1             | 0           | -0.772467       | 3.003254  | -2.179765 |
| 41            | 1             | 0           | -3.400805       | -1.006667 | -1.304913 |
| 42            | 1             | 0           | -2.284979       | 2.687485  | -1.301134 |
| 43            | 1             | 0           | -3.687441       | -2.760911 | 1.274290  |
| 44            | 1             | 0           | -1.553766       | 4.310857  | 1.276362  |
| 45            | 1             | 0           | -2.312058       | -2.105027 | 2.179700  |
| 46            | 1             | 0           | -0.763562       | 3.006590  | 2.180111  |
| 47            | 1             | 0           | -3.401132       | -1.006583 | 1.303660  |
| 48            | 1             | 0           | -2.279594       | 2.688481  | 1.308327  |

**Complete citation for Ref. 79:**

(79) Gaussian 03, Revision D.02, Frisch, M. J.; Trucks, G. W.; Schlegel, H. B.; Scuseria, G. E.; Robb, M. A.; Cheeseman, J. R.; Montgomery, Jr., J. A.; Vreven, T.; Kudin, K. N.; Burant, J. C.; Millam, J. M.; Iyengar, S. S.; Tomasi, J.; Barone, V.; Mennucci, B.; Cossi, M.; Scalmani, G.; Rega, N.; Petersson, G. A.; Nakatsuji, H.; Hada, M.; Ehara, M.; Toyota, K.; Fukuda, R.; Hasegawa, J.; Ishida, M.; Nakajima, T.; Honda, Y.; Kitao, O.; Nakai, H.; Klene, M.; Li, X.; Knox, J. E.; Hratchian, H. P.; Cross, J. B.; Bakken, V.; Adamo, C.; Jaramillo, J.; Gomperts, R.; Stratmann, R. E.; Yazyev, O.; Austin, A. J.; Cammi, R.; Pomelli, C.; Ochterski, J. W.; Ayala, P. Y.; Morokuma, K.; Voth, G. A.; Salvador, P.; Dannenberg, J. J.; Zakrzewski, V. G.; Dapprich, S.; Daniels, A. D.; Strain, M. C.; Farkas, O.; Malick, D. K.; Rabuck, A. D.; Raghavachari, K.; Foresman, J. B.; Ortiz, J. V.; Cui, Q.; Baboul, A. G.; Clifford, S.; Cioslowski, J.; Stefanov, B. B.; Liu, G.; Liashenko, A.; Piskorz, P.; Komaromi, I.; Martin, R. L.; Fox, D. J.; Keith, T.; Al-Laham, M. A.; Peng, C. Y.; Nanayakkara, A.; Challacombe, M.; Gill, P. M. W.; Johnson, B.; Chen, W.; Wong, M. W.; Gonzalez, C.; and Pople, J. A.; Gaussian, Inc., Wallingford CT, 2004.

- 
- (1) (a) Semmelhack, M. F.; Chou, C. S.; Cortes, D. A. *J. Am. Chem. Soc.* **1983**, *105*, 4492–4494. (b) Original measurement vs. Ag/AgNO<sub>3</sub>. Converted to a value vs. Cp<sub>2</sub>Fe<sup>+0</sup> by subtracting 0.088V.
- (2) (a) Mori, Y., Yukie Sakaguchi; Hayashi, H. *J. Phys. Chem. A* **2000**, *104*, 4896–4905. (b) Samanta, A.; Bhattacharyya, K.; Das, P. K.; Kamat, P. V.; Weir, D.; Hug, G. L. *J. Phys. Chem.* **1989**, *93*, 3651–3656.
- (3) Bordwell, F. G.; Liu, W. Z. *J. Am. Chem. Soc.* **1996**, *118*, 10819–10823.
- (4) Chantooni Jr., M. K.; Kolthoff, I. M. *J. Phys. Chem.* **1976**, *80*, 1306–1310.
- (5) Kutt, A.; Leito, I.; Kaljurand, I.; Soovali, L.; Vlasov, V. M.; Yagupolskii, L. M.; Koppel, I. A. *J. Org. Chem.* **2006**, *71*, 2829–2838.
- (6) (a) Malatesta, V.; Ingold, K. U. *J. Am. Chem. Soc.* **1973**, *95*, 6404–6407. (b) Hoffman, B. M.; Eames, T. B. *J. Am. Chem. Soc.* **1969**, *91*, 2169–2170.
- (7) Bakalbassis, E. G.; Lithoxidou, A. T.; Vafiadis, A. P. *J. Phys. Chem. A* **2003**, *107*, 8594–8606.
- (8) Bondi, A. *J. Phys. Chem.* **1964**, *68*, 441.
